# Supplementary material for: Exploration of the dynamic equilibrium between the rare earth ion location within a RE-NaY zeolite and the FCC carbon deposition precursor
Source: Royal Society of Chemistry journal article supplement (doi:10.1039/d5ce01202c), 2026-01-01
Supplement: d5ce01202c1.pdf [file d5ce01202c1.pdf]

## Supplementary information

### **Exploration of the dynamic equilibrium between the rare earth location within RE-NaY zeolite and the FCC carbon deposition precursor**

Zhongxing Geng, <sup>\*ab</sup> Yucai Qin, <sup>b</sup> Zhiqiang Zhang <sup>\*a</sup> and Lijuan Song <sup>\*ab</sup>

<sup>a</sup> School of Chemical Engineering, University of Science and Technology Liaoning,

Anshan, 114051, P.R. China. E-mail: zhangzhiqiang@ustl.edu.cn

E-mail: gruxing@163.com

<sup>b</sup> School of Petrochemical Engineering, Liaoning Petrochemical University, Fushun,

113001, P.R. China. E-mail: lsong56@263.net

**Table S1 Quantitative semi-analysis of the peak areas at 1521 cm<sup>-1</sup> and 1488 cm<sup>-1</sup>**

|           | Peak area at 1521 cm <sup>-1</sup> | Peak area at 1488 cm <sup>-1</sup> |
|-----------|------------------------------------|------------------------------------|
| Fig. 12-d | 1.35                               | 0.41                               |
| Fig. 12-f | 0.99                               | 0.36                               |
| Fig. 12-j | 0.16                               | 0.09                               |
| Fig. 12-l | 0.066                              | 0.036                              |

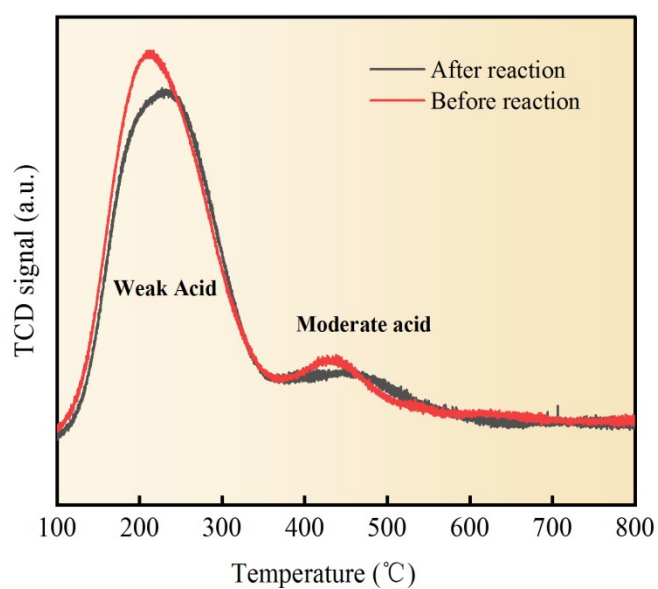

**Fig.S1 NH<sub>3</sub>-TPD spectra of before/after reaction of Ce<sub>0.01</sub>Y-550 zeolite sample**
